# Supplementary material for: A trifunctional photopatterning component derived from cysteine: fabrication of a deposited silver micropattern
Source: Royal Society of Chemistry journal article supplement (doi:10.1039/c2jm13448a), 2012-01-01
Supplement: c2jm13448a.pdf [file c2jm13448a.pdf]

## Electronic Supplementary Materials

### A heterotrifunctional photo-patterning component derived from cysteine: a fabrication of silver deposited micro-pattern

Masahiro Furutani<sup>a</sup> and Kazuaki Kudo<sup>\*a</sup>

<sup>a</sup> Institute of Industrial Science, The university of Tokyo, 4-6-1 Komaba, Meguro-ku, Tokyo, 153-8505, Japan.

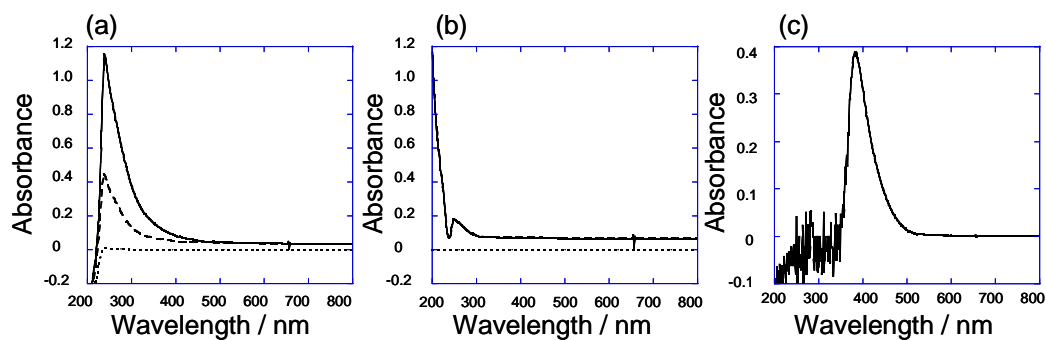

**Fig. S1** UV-vis spectra of cysteine methyl ester (containing a little amount of cysteine methyl ester) mixed with (a) and without (b) silver ammine complex, before mixing (dot), 30 sec (dash) and 270 sec (solid) after mixing.

In the case of higher concentration of ester (c), generation of silver plasmon absorption was observed in the differential spectrum.

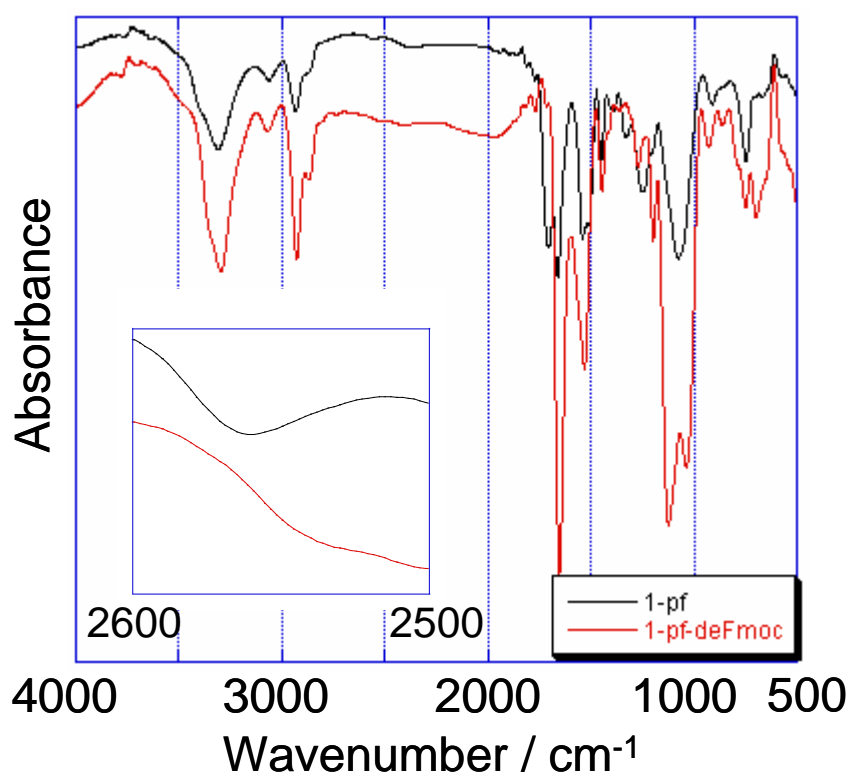

**Fig.S2** FTIR spectra of **1-pf** before (black) and after (red) deFmoc treatment.
